# Supplementary material for: Efficient Whole-Genome Sequencing of Monkeypox Virus Using a Novel Nuclease-Multiple Displacement Amplification Enrichment Method
Source: Research Square preprint supplement (doi:10.21203/rs.3.rs-7498557/v1), 2025-09-10
Supplement: Supplementary file 1 [file 17f669b0339274c268f886b4.docx]

Supplementary Table 1. Strains from public databases used for phylogenetic analysis

| **Strain** | **Reference(s)** | **Accession #** |
| --- | --- | --- |
| 24MPX0198V | 1 | PP601207 |
| 24MPX0201V | 1 | PP601208 |
| Boende_DRC_2008 | 2 | KP849469 |
| Cameroon-1990 | 2,3 | KJ642618 |
| Congo_2003_358 | 4,5 | DQ011154 |
| Congo-8 | 2,6 | KJ642613 |
| COP-58 | 7-9 | AY753185 |
| Cote d’Ivoire_1971 | 2,10 | KP849470 |
| DRC_Yandongi_1985 | 11,12 | KC257460 |
| Gabon-1988 | 2,13 | KJ642619 |
| Ikubi | 2,11 | KJ642612 |
| Liberia_1970_184 | 4,14,15 | DQ011156 |
| MPXV-Singapore | 16 | MT903342 |
| MPXV-WRAIR7-61 | 8,17 | AY603973 |
| Nigeria-SE-1971 | 4,14,15 | KJ642617 |
| PCH | 2,18 | KJ642616 |
| SL-V70 | 8,14,15 | AY741551 |
| Sudan_2005_01 | 12 | KC257459 |
| USA_2003_039 | 4,19 | DQ011157 |
| USA_2003_044 | 4,19 | DQ011153 |
| UTC | 2,20 | KJ642614 |
| V79-I-005 | 21 | HQ857562 |
| W-Nigeria | 2,22 | KJ642615 |
| Yambuku_DRC_1985 | 2,23 | KP849471 |
| Zaire-96-I-16 | 24,25 | AF380138 |

Supplementary Table 2. Primer sequences used for qPCR.

| **Target** | **Forward primer** | | **Reverse primer** | | **Product size (bases)** |
| --- | --- | --- | --- | --- | --- |
| **Name** | **Sequence** | **Name** | **Sequence** |
| LC16m8 *G9R* gene | E9L-F | TGCAACTGAACGCGTTCTTG | E9L -R | GTCATAAGGGAGTAGGCGGC | 153 |
| Rabbit *GAPDH* gene | GAPDH -F | ACTACATGGTGAGTGCTGCC | GAPDH-R | TTCCCGTTCTCAGCCTTGAC | 158 |

References of Supplementary Table 1

1 Vakaniaki, E. H. *et al.* Sustained human outbreak of a new MPXV clade I lineage in eastern Democratic Republic of the Congo. *Nat Med* **30**, 2791-2795 (2024). <https://doi.org/10.1038/s41591-024-03130-3>

2 Nakazawa, Y. *et al.* A phylogeographic investigation of African monkeypox. *Viruses* **7**, 2168-2184 (2015). <https://doi.org/10.3390/v7042168>

3 Tchokoteu, P. F. *et al.* [Variola or a severe case of varicella? A case of human variola due to monkeypox virus in a child from the Cameroon]. *Ann Soc Belg Med Trop* **71**, 123-128 (1991).

4 Likos, A. M. *et al.* A tale of two clades: monkeypox viruses. *J Gen Virol* **86**, 2661-2672 (2005). <https://doi.org/86/10/2661> [pii]10.1099/vir.0.81215-0

5 Learned, L. A. *et al.* Extended interhuman transmission of monkeypox in a hospital community in the Republic of the Congo, 2003. *Am J Trop Med Hyg* **73**, 428-434 (2005).

6 Ladnyj, I. D., Ziegler, P. & Kima, E. A human infection caused by monkeypox virus in Basankusu Territory, Democratic Republic of the Congo. *Bull World Health Organ* **46**, 593-597 (1972).

7 von Magnus, P., Andersen, E. K., Petersen, K. B. & Andersen, A. B. A pox-like disease in cynomolgus monkeys. *Acta Pathologica Microbiologica Scandinavica* **46**, 156-176 (1959).

8 Chen, N. *et al.* Virulence differences between monkeypox virus isolates from West Africa and the Congo basin. *Virology* **340**, 46-63 (2005). <https://doi.org/S0042-6822(05)00330-2> [pii]10.1016/j.virol.2005.05.030

9 Arita, I. & Henderson, D. A. Smallpox and monkeypox in non-human primates. *Bull World Health Organ* **39**, 277-283 (1968).

10 Arita, I. & Henderson, D. A. Monkeypox and whitepox viruses in West and Central Africa. *Bull World Health Organ* **53**, 347-353 (1976).

11 Jezek, Z., Khodakevich, L. N. & Wickett, J. F. Smallpox and its post-eradication surveillance. *Bull World Health Organ* **65**, 425-434 (1987).

12 Nakazawa, Y. *et al.* Phylogenetic and ecologic perspectives of a monkeypox outbreak, southern Sudan, 2005. *Emerg Infect Dis* **19**, 237-245 (2013). <https://doi.org/10.3201/eid1902.121220>

13 Muller, G. *et al.* Monkeypox virus in liver and spleen of child in Gabon. *Lancet* **1**, 769-770 (1988). <https://doi.org/10.1016/s0140-6736(88)91580-2>

14 Foster, S. O. *et al.* Human monkeypox. *Bull World Health Organ* **46**, 569-576 (1972).

15 Lourie, B. *et al.* Human infection with monkeypox virus: laboratory investigation of six cases in West Africa. *Bull World Health Organ* **46**, 633-639 (1972).

16 Mauldin, M. R. *et al.* Exportation of Monkeypox Virus From the African Continent. *J Infect Dis* **225**, 1367-1376 (2022). <https://doi.org/10.1093/infdis/jiaa559>

17 McConnell, S. J., Herman, Y. F., Mattson, D. E. & Erickson, L. Monkey Pox Disease in Irradiated Cynomologous Monkeys. *Nature* **195**, 1128-1129 (1962). <https://doi.org/10.1038/1951128a0>

18 Milhaud, C., Klein, M. & Virat, J. Analyse dʼun cas de variole du singe (monkeypox) chez le chimpanzé (Pan troglodytes). *Expériences Animales* **2**, 121-135 (1969).

19 Reed, K. D. *et al.* The detection of monkeypox in humans in the Western Hemisphere. *N Engl J Med* **350**, 342-350 (2004). <https://doi.org/10.1056/NEJMoa032299>350/4/342 [pii]

20 Peters, J. C. AN EPIZOOTIC OF MONKEY POX AT ROTTERDAM ZOO. *International Zoo Yearbook* **6**, 274-275 (1966). <https://doi.org/https://doi.org/10.1111/j.1748-1090.1966.tb01794.x>

21 Estep, R. D. *et al.* Deletion of the monkeypox virus inhibitor of complement enzymes locus impacts the adaptive immune response to monkeypox virus in a nonhuman primate model of infection. *J Virol* **85**, 9527-9542 (2011). <https://doi.org/10.1128/JVI.00199-11>

22 Breman, J. G. *et al.* Human monkeypox, 1970-79. *Bull World Health Organ* **58**, 165-182 (1980).

23 Khodakevich, L., Jezek, Z. & Kinzanzka, K. Isolation of monkeypox virus from wild squirrel infected in nature. *Lancet* **1**, 98-99 (1986). <https://doi.org/S0140-6736(86)90748-8> [pii]

24 Hutin, Y. J. *et al.* Outbreak of human monkeypox, Democratic Republic of Congo, 1996 to 1997. *Emerg Infect Dis* **7**, 434-438 (2001).

25 Shchelkunov, S. N. *et al.* Human monkeypox and smallpox viruses: genomic comparison. *FEBS Lett* **509**, 66-70 (2001). <https://doi.org/10.1016/s0014-5793(01)03144-1>
