# Supplementary material for: Efficient Whole-Genome Sequencing of Monkeypox Virus Using a Novel Nuclease-Multiple Displacement Amplification Enrichment Method
Source: Research Square preprint supplement (doi:10.21203/rs.3.rs-7498557/v1), 2025-09-10
Supplement: Supplementary file 1 [file 4992a37d094b45a2ebab5945.pdf]

# Nuclease-MDA for Enriching Monkeypox Virus Genomes for NGS

Masayasu Misu<sup>1</sup>, Takeshi Kurosu<sup>1</sup>, Tomoki Yoshikawa<sup>1</sup>, Madoka Kawahara<sup>1</sup>, Kohei Oishi<sup>1</sup>, Masayuki Shimojima<sup>1</sup>, Hideki Ebihara<sup>1</sup>

<sup>1</sup>Department of Virology I, National Institute of Infectious Diseases

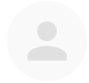

Tomoki Yoshikawa

National Institute of Infectious Diseases

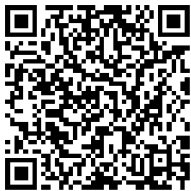

**Protocol Info:** Masayasu Misu, Takeshi Kurosu, Tomoki Yoshikawa, Madoka Kawahara, Kohei Oishi, Masayuki Shimojima, Hideki Ebihara . Nuclease-MDA for Enriching Monkeypox Virus Genomes for NGS. **protocols.io** <https://protocols.io/view/nuclease-mda-for-enriching-monkeypox-virus-genomes-cvxtw7nn>

**Created:** June 20, 2023

**Last Modified:** August 29, 2025

**Protocol Integer ID:** 83667

**Keywords:** Oxford Nanopore Technology, RNA virus, Sequence method, MinION, Nanopore sequencing, RCA-NGS

## Abstract

This protocol describes the enrichment of the monkeypox virus (MPXV) genome using the Nuclease-MDA method, optimized for Oxford Nanopore Technologies (ONT) sequencing with V14 chemistry.

The method can also be adapted for Illumina sequencing following Section 7 of this protocol. The protocol has been validated using Illumina DNA Prep, (M) Tagmentation (Cat#20060060), IDT for Illumina DNA/RNA UD Indexes Set A (Cat#20027213), and the iSeq100 platform.

This approach eliminates unwanted host DNA via micrococcal nuclease treatment, preserving the intact viral genome. The viral genome is then amplified using multiple displacement amplification (MDA), an isothermal whole-genome amplification (WGA) technique employing Phi29 polymerase. This method provides a high proportion of viral reads (~90%) without requiring specific PCR or virus concentration steps.

This method enables high-depth whole-genome sequencing of MPXV and can be readily adapted to other poxviruses, such as vaccinia virus and cowpox virus, with appropriate primer modifications.

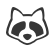

## Materials

-  Micrococcal Nuclease - 320,000 gel units **New England Biolabs Catalog #M0247S**
-  High Pure Viral Nucleic Acid Kit **Roche Catalog #11858874001**
- **Dr.GenTLE Precipitation Carrier - Takara Catalog #9094**
-  Agencourt AMPure XP **Beckman Coulter Catalog #A63880**
- **GenomiPhi V3 Ready-To-Go DNA Amplification Kit - Cytiva Catalog #25-6601-24**
-  T7 Endonuclease I - 250 units **New England Biolabs Catalog #M0302S**
-  NEBNext FFPE DNA Repair Mix - 24 rxns **New England Biolabs Catalog #M6630S**
-  NEBNext Ultra II End Repair/dA-Tailing Module - 24 rxns **New England Biolabs Catalog #E7546S**
-  Blunt/TA Ligase Master Mix - 50 rxns **New England Biolabs Catalog #M0367S**
-  NEBNext Quick Ligation Module - 20 rxns **New England Biolabs Catalog #E6056S**
- **Native Barcoding Kit 24 V14 - Oxford Nanopore Technologies Catalog #SQK-NBD114.24**
-  Qubit 4 Fluorometer **Thermo Fisher Scientific Catalog #Q33238**
-  Qubit 1X dsDNA HS Assay Kit **Thermo Fisher Scientific Catalog #Q33230**
-  DNA LoBind Tube 1.5ml **Eppendorf Catalog #022431021**
-  0.2 ml PCR Tube strips **Eppendorf Catalog #0030124359**
- **100 % ethanol**
- **70 % ethanol**
- **TE(pH8.0)**
- **nuclease-free H<sub>2</sub>O**



## Protocol materials

- ☒ Micrococcal Nuclease - 320,000 gel units **New England Biolabs Catalog #M0247S**
- ☒ T4 RNA Ligase 2, truncated KQ - 2,000 units **New England Biolabs Catalog #M0373S**
- ☒ Superscript IV **Thermo Fisher Scientific Catalog #18090050**
- ☒ 0.2 ml PCR Tube strips **Eppendorf Catalog #0030124359**
- ☒ NEBNext FFPE DNA Repair Mix - 24 rxns **New England Biolabs Catalog #M6630S**
- ☒ NEBNext Ultra II End Repair/dA-Tailing Module - 24 rxns **New England Biolabs Catalog #E7546S**
- ☒ Agencourt AMPure XP **Beckman Coulter Catalog #A63880**
- ☒ High Pure Viral Nucleic Acid Kit **Roche Catalog #11858874001**
- ☒ NEBNext Ultra II End Repair/dA-Tailing Module - 24 rxns **New England Biolabs Catalog #E7546S**
- ☒ Qubit 4 Fluorometer **Thermo Fisher Scientific Catalog #Q33238**
- ☒ Qubit 1X dsDNA HS Assay Kit **Thermo Fisher Scientific Catalog #Q33230**
- ☒ Micrococcal Nuclease - 320,000 gel units **New England Biolabs Catalog #M0247S**
- ☒ DNA LoBind Tube 1.5ml **Eppendorf Catalog #022431021**
- ☒ 0.2 ml PCR Tube strips **Eppendorf Catalog #0030124359**
- ☒ Agencourt AMPure XP **Beckman Coulter Catalog #A63880**
- ☒ T7 Endonuclease I - 250 units **New England Biolabs Catalog #M0302S**
- ☒ NEBNext FFPE DNA Repair Mix - 24 rxns **New England Biolabs Catalog #M6630S**
- ☒ Blunt/TA Ligase Master Mix - 50 rxns **New England Biolabs Catalog #M0367S**
- ☒ NEBNext Quick Ligation Module - 20 rxns **New England Biolabs Catalog #E6056S**
- ☒ High Pure Viral Nucleic Acid Kit **Roche Catalog #11858874001**
- ☒ Agencourt AMPure XP **Beckman Coulter Catalog #A63880**
- ☒ Agencourt AMPure XP **Beckman Coulter Catalog #A63880**
- ☒ Agencourt AMPure XP **Beckman Coulter Catalog #A63880**
- ☒ DNA LoBind Tube 1.5ml **Eppendorf Catalog #022431021**
- ☒ Agencourt AMPure XP **Beckman Coulter Catalog #A63880**
- ☒ NEBNext Quick Ligation Module - 20 rxns **New England Biolabs Catalog #E6056S**
- ☒ Qubit dsDNA BR (Broad Range) assay **Thermo Fisher Scientific Catalog #Q32850**
- ☒ T7 Endonuclease I - 250 units **New England Biolabs Catalog #M0302S**
- ☒ Blunt/TA Ligase Master Mix - 50 rxns **New England Biolabs Catalog #M0367S**
- ☒ Qubit dsDNA BR (Broad Range) assay **Thermo Fisher Scientific Catalog #Q32850**

## Safety warnings

 Follow your facility's regulations and biosafety practices.

## Before start

It is recommended to check for the absence of bacterial contamination (e.g., *Mycoplasma* spp.).



## Preparation for virus supernatant

- 1 Centrifuge the working stock virus to remove debris.

 6000 x g, Room temperature, 00:10:00

10m

- 2 Transfer  180  $\mu\text{L}$  virus supernatant to a 1.5ml screw cap tube.

- 3 Unwanted DNA and RNA mainly originating from the virus-infected cells are digested using

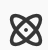

Micrococcal Nuclease - 320,000 gel units **New England Biolabs Catalog #M0247S**

- 3.1 Total 200  $\mu\text{L}$  reaction

1h

-  179  $\mu\text{L}$  virus supernatant
-  20  $\mu\text{L}$  10X Micrococcal Nuclease Reaction Buffer
-  1  $\mu\text{L}$  Micrococcal nuclease

Mix by pipetting and spin down.

 37 °C water bath  01:00:00

## The viral genomic DNA extraction

- 4 The viral genomic DNA extraction is performed using

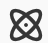

High Pure Viral Nucleic Acid Kit **Roche Catalog #11858874001**

- 4.1 Add  200  $\mu\text{L}$  of binding buffer,  4  $\mu\text{L}$  PolyA carrier RNA and  50  $\mu\text{L}$  Proteinase K.

10m

Mix well by pipetting and inverting the tube thoroughly, and spin down.

 72 °C  00:10:00

- 4.2 Add  100  $\mu\text{L}$  of binding buffer and mix well by pipetting or inverting the tube thoroughly, and spin down.

- 4.3 Transfer the whole sample to a High Pure Filter Tube.



8000 x g, Room temperature, 00:01:00

1m

Discard the flow-through liquid and Collection Tube, and insert the Filter Tube into a new Collection Tube.

4.4 Add 500  $\mu\text{L}$  of inhibitor removal buffer.

1m

8000 x g, Room temperature, 00:01:00

Discard the flow-through liquid and Collection Tube, and insert the Filter Tube into a new Collection Tube.

4.5 Add 450  $\mu\text{L}$  of wash buffer.

1m

8000 x g, Room temperature, 00:01:00

Discard the flow-through liquid and Collection Tube, and insert the Filter Tube into a new Collection Tube.

4.6 Add 450  $\mu\text{L}$  of wash buffer.

1m

13000 x g, Room temperature, 00:01:00 and discard the flow-through liquid.

Discard the Collection Tube and insert the Filter Tube into a 1.5 ml tube -

DNA LoBind Tube 1.5ml Eppendorf Catalog #022431021 .

4.7 Add 50  $\mu\text{L}$  elution Buffer.

1m

13000 x g, Room temperature, 00:01:00

#### Note

The purified 50  $\mu\text{L}$  viral genomic DNA can be stored at  $-80^{\circ}\text{C}$ .

## Amplification of DNA by multiple displacement amplification (MDA)

5 DNA is amplified by MDA using **GenomiPhi V3 Ready-To-Go DNA Amplification Kit - Cytiva Catalog #25-6601-24.**

5.1 Total 20  $\mu\text{l}$  reaction

3m

- 10  $\mu\text{L}$  purified viral genomic DNA



-  10  $\mu\text{L}$  2X denaturation buffer

Mix by pipetting and spin down.

 95 °C  00:03:00

 4 °C on ice

- 5.2 Add  20  $\mu\text{L}$  denatured sample to Ready to go GenomiPhi cake.

4h 10m

 30 °C  04:00:00

 65 °C  00:10:00

#### Note

The amplified  20  $\mu\text{L}$  viral genomic DNA can be stored at -80°C.

## DNA purification by AMPure XP

- 6 The DNA is purified using

 Agencourt AMPure XP **Beckman Coulter Catalog #A63880**

- 6.1 Add  10  $\mu\text{L}$  (X0.5 volume) AMPure beads

- 6.2 Incubate on rotor mixer.

 00:05:00  Room temperature

5m

- 6.3 Spin down and pellet on a magnet.

Wait for  00:01:00 and pipette off the supernatant.

1m

- 6.4 Wash twice by  100  $\mu\text{L}$  70 % ethanol, remove the ethanol using a pipette, and discard.

- 6.5 Spin down and pipette off any residual ethanol.

- 6.6 Resuspend pellet in  40  $\mu\text{L}$  nuclease-free H<sub>2</sub>O.

Incubate on a rotor mixer.

5m

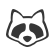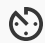

00:05:00

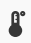

Room temperature

6.7 Spin down and pellet the beads on the magnet until the elute is clear and colorless.

6.8 Remove and retain  40  $\mu\text{L}$  elute into a new tube.

7 DNA concentration is measured using a Qubit 4 Fluorometer with

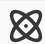Qubit dsDNA BR (Broad Range) assay **Thermo Fisher Scientific Catalog #Q32850**

2m

-  199  $\mu\text{L}$  1X working solution
-  1  $\mu\text{L}$  DNA

Mix by vortexing.

Incubate  00:02:00  Room temperature and measure.

#### Note

Confirm the total amplified DNA to be over 1500 ng.

The DNA can be stored at  -30  $^{\circ}\text{C}$  for at least two months.

#### Note

At this step, whole-genome sequencing using an Illumina next-generation sequencer is also possible. In this case, the T7 endonuclease treatment and any subsequent steps in this protocol are not required. Instead, you should follow Illumina's library preparation protocol. We have confirmed that this works using the Illumina DNA Prep, (M) Tagmentation (Cat#20060060) and the IDT for Illumina DNA/RNA UD Indexes Set A (Cat#20027213).

Similarly, the Oxford Nanopore Rapid Barcoding Kit 24 V14 (SQK-RBK114.24) can also be used. Here, the T7 endonuclease treatment is also not required. From this point, you should proceed by following the Rapid Barcoding Kit protocol, which significantly reduces library preparation time.

## T7 endonuclease treatment



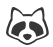

## 8 The amplified DNA by MDA is digested using

T7 Endonuclease I - 250 units **New England Biolabs Catalog #M0302S** .

The following protocol is modified based on the Native barcoding amplicons (with EXP-NBD104, EXPNBD114, and SQK-LSK109) protocol (NBA\_9093\_v109\_revA\_12Nov2019) provided by the Oxford Nanopore Technologies website.

### 8.1 Total 30 µl reaction

30m

- x µL (1.0 µg) DNA
- 3 µL NEBuffer 2
- 1.5 µL T7 endonuclease I
- 25.5-x µL nuclease-free H<sub>2</sub>O

Mix by pipetting and spin down.

37 °C 00:30:00

## 9 The DNA is purified using

Agencourt AMPure XP **Beckman Coulter Catalog #A63880**

Add 15 µL (X0.5 volume) AMPure beads

[go to step #6.3](#)

Resuspend pellet in 13 µL nuclease-free H<sub>2</sub>O.

## DNA repair and end-prep

## 10 The purified DNA is end-prepped using

NEBNext FFPE DNA Repair Mix - 24 rxns **New England Biolabs Catalog #M6630S**

and

NEBNext Ultra II End Repair/dA-Tailing Module - 24 rxns **New England Biolabs Catalog #E7546S**

### 10.1 Total 15 µl reaction

35m

- 12 µL DNA
- 0.875 µL NEB Next FFPE DNA repair buffer
- 0.5 µL NEB Next FFPE DNA repair Mix
- 0.875 µL Ultra II end-prep reaction buffer
- 0.75 µL Ultra II end-prep reaction Mix

Mix by pipetting and spin down.



20 °C 00:30:00

65 °C 00:05:00

11 The DNA is purified using

 Agencourt AMPure XP **Beckman Coulter Catalog #A63880** .

Add 15 µL (X1.0 volume) AMPure beads

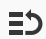Resuspend pellet in 10 µL nuclease-free H<sub>2</sub>O.**Note**

The DNA can be stored at 4°C overnight.

**Native barcode ligation**12 The end-prepped DNA is ligated with native barcode using **Native Barcoding Kit V14 - Oxford Nanopore Technologies Catalog #SQK-NBD114.24 or #SQK-NBD114.24 with** Blunt/TA Ligase Master Mix - 50 rxns **New England Biolabs Catalog #M0367S** .

12.1 Total 20 µl reaction

20m

- 8.5 µL DNA
- 1.5 µL native barcode
- 10 µL Blunt/TA ligase master mix

Mix by pipetting and spin down.

Room temperature 00:20:00

12.2 Add the following volume of EDTA to each well and mix thoroughly by pipetting and spin down briefly.

**Note**

Ensure you follow the instructions for the cap colour of your EDTA tube.

| EDTA cap colour    | Volume per well |
|--------------------|-----------------|
| For clear cap EDTA | 2 µl            |



| EDTA cap colour   | Volume per well |
|-------------------|-----------------|
| For blue cap EDTA | 4 $\mu$         |

EDTA is added at this step to stop the reaction.

13 Pool all the barcoded samples in a 1.5 ml Eppendorf DNA LoBind tube.

14 The DNA is purified using

 Agencourt AMPure XP **Beckman Coulter Catalog #A63880**

Add  8.8 or 9.6  $\mu$ L (X0.4 volume) AMPure beads multiply by the original number of tubes.

14.1 Incubate on rotor mixer.

 00:05:00  Room temperature

5m

14.2 Spin down and pellet on a magnet.

Wait for  00:01:00 and pipette off the supernatant.

1m

14.3 Wash twice by  700  $\mu$ L 70 % ethanol, remove the ethanol using a pipette, and discard.

14.4 Spin down and pipette off any residual ethanol.

14.5 Resuspend the pellet in 15  $\mu$ L of nuclease-free H<sub>2</sub>O.

If the pooled sample volume exceeds 100  $\mu$ L (i.e., more than 5 samples), resuspend the pellet in x0.2 volume of the pooled sample (e.g., 20  $\mu$ L when 5 samples are pooled) of nuclease-free H<sub>2</sub>O.

Incubate on a rotor mixer.

 00:10:00  37 °C

Every 2 minutes, agitate the sample by gently flicking for 10 seconds to encourage DNA elution.

10m

14.6 Spin down and pellet the beads on the magnet until the elute is clear and colorless.

14.7 Remove and retain the elute into a new tube.



## Adaptor ligation and clean-up

20m

- 15 Adaptor Ligation with pooled samples is performed using **Ligation Sequencing Kit - Oxford Nanopore Technologies Catalog #SQK-NBD114.24 or #SQK-NBD114.96 with**

 NEBNext Quick Ligation Module - 20 rxns **New England Biolabs Catalog #E6056S**

- 15.1 Total 20 µl reaction

20m

-  12 µL DNA
-  2 µL Native Adapter (NA)
-  4 µL NEB Next Quick Ligation Reaction Buffer(5X)
-  2 µL Quick T4 DNA ligase

Mix gently and incubate.

 Room temperature  00:20:00

- 16 The adaptor-ligated DNA is purified using

 Agencourt AMPure XP **Beckman Coulter Catalog #A63880** .

Prepare AMPure XP beads for use; resuspend by vortexing.

Transfer amplified DNA sample to 1.5ml low binding tube.

- 16.1 Add  10 µL (X0.5 volume) AMPure XP reagent and mix by pipetting.

Incubate on a rotor mixer.

 00:05:00  Room temperature

- 16.2 Spin down and pellet on a magnet. Wait for  00:01:00 and pipette off the supernatant.

- 16.3 ▪ Wash twice by  100 µL Short Fragment Buffer(SFB) and remove the SFB using a pipette and discard.

- 16.4 Spin down and pipette off any residual SFB.

- 16.5 ▪ Resuspend pellet in  15 µL Elution Buffer (EB)

5m

 00:05:00  Room temperature and tapping occasionally.

- 16.6 Spin down and pellet the beads on the magnet until the elute is clear and colourless.



16.7 Remove retain  15  $\mu\text{L}$  elute into a new tube.

17 DNA concentration is measured using a Qubit 4 Fluorometer with

2m

 Qubit dsDNA BR (Broad Range) assay **Thermo Fisher Scientific Catalog #Q32850**

.

-  199  $\mu\text{L}$  1X working solution
-  1  $\mu\text{L}$  DNA

Mix by vortexing.

Incubate  00:02:00  Room temperature and measure.

#### Note

The molar concentration of the DNA sample can be converted based on the length of the major band confirmed by electrophoresis after T7 endonuclease treatment. Typically, the fragment lengths are around 2000 base pairs.

18 Make up the library to  12  $\mu\text{L}$  at 10-20 fmol

## Sequencing by MinION

19 Sequencing according to the manufacturer's instructions.
